# Supplementary material for: Multiplexed stimuli-responsive molecules for high-security anti-counterfeiting applications
Source: Royal Society of Chemistry journal article supplement (doi:10.1039/d2tc05404c), 2023-01-01
Supplement: d2tc05404c1.pdf [file d2tc05404c1.pdf]

## Supporting Information

### **Multiplexed stimuli-responsive molecules for high-security anti-counterfeiting applications**

*Hongyan Xia, Tommy Loan, Mithun Santra, Kang Xie,\* Mark Bradley\**

#### Supplementary Videos

**Video S1.** The switch of the “Rabbit” image printed with the ID ink under different external stimuli. (Separated file)

**Video S2.** The switch of the “Cat” image printed with the SP ink under different external stimuli. (Separated file)

**Video S3.** The switch of the images of “Rabbit” and “Cat” images printed with the ID and SP inks under external stimuli. (Separated file)

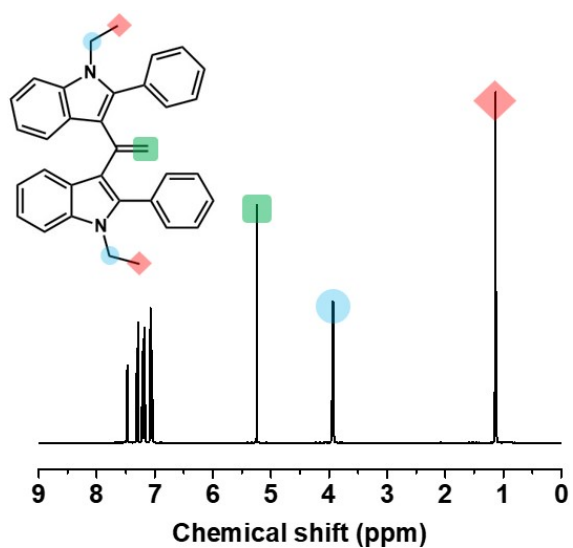

**Figure S1.**  $^1\text{H}$  NMR spectra of ID ( $\text{CDCl}_3$ , 500MHz at 298K).

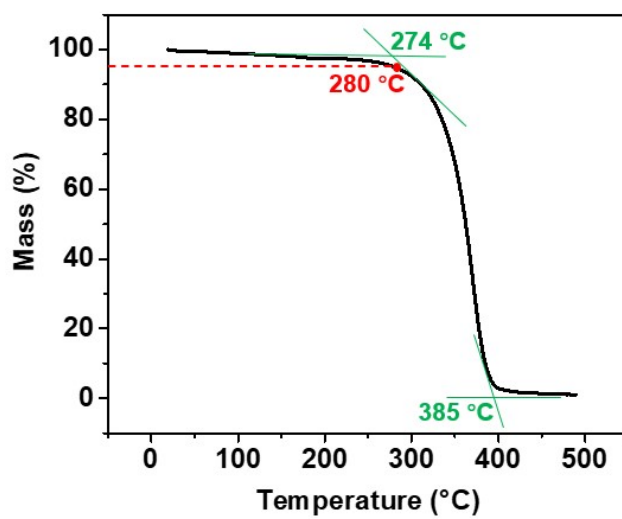

**Figure S2.** The TGA curve of the ID recorded under Argon at a heating rate of 10  $^{\circ}\text{C}/\text{min}$ .

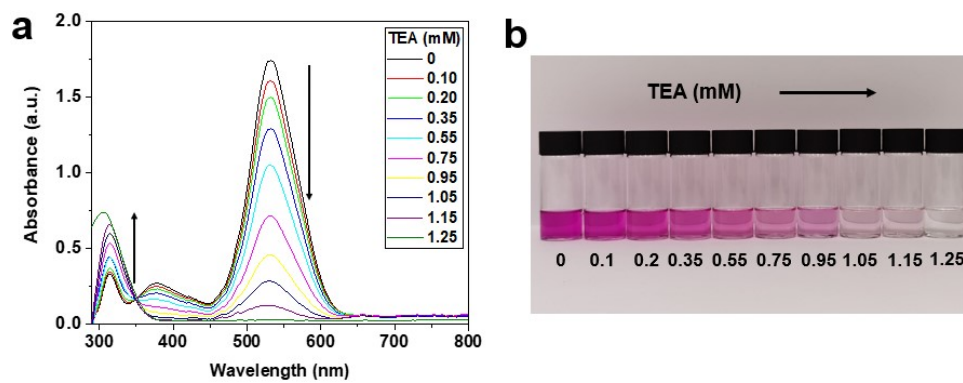

**Figure S3.** (a) UV-vis absorption spectra changes and (b) Images of colorimetric responses of ID in  $\text{CH}_2\text{Cl}_2$  (0.05 mM) with 2.0 mM TFA upon adding different concentrations of TEA (from 0 to 1.25mM).

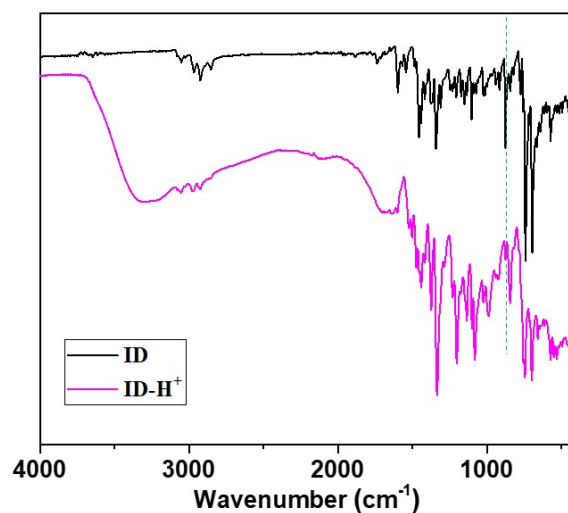

**Figure S4.** FT-IR spectra of ID and ID- $\text{H}^+$ .

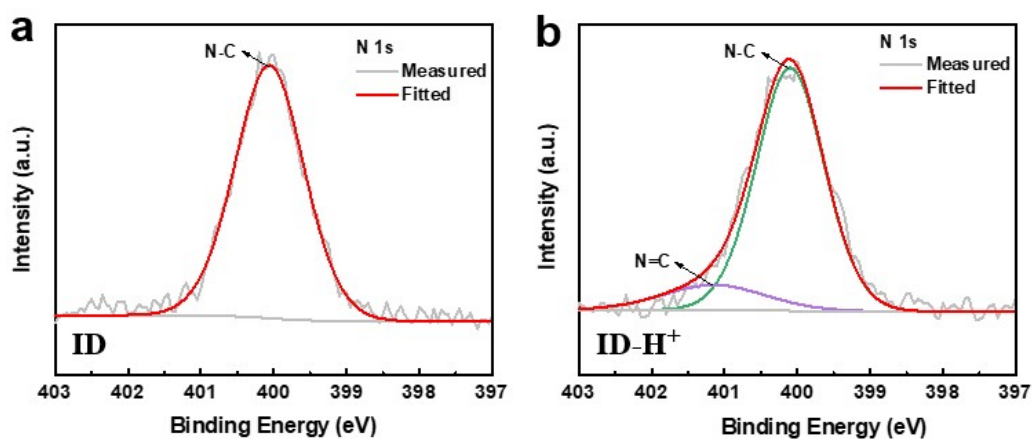

**Figure S5.** High-resolution XPS fitting results for the N1s spectra of ID and ID- $\text{H}^+$ .

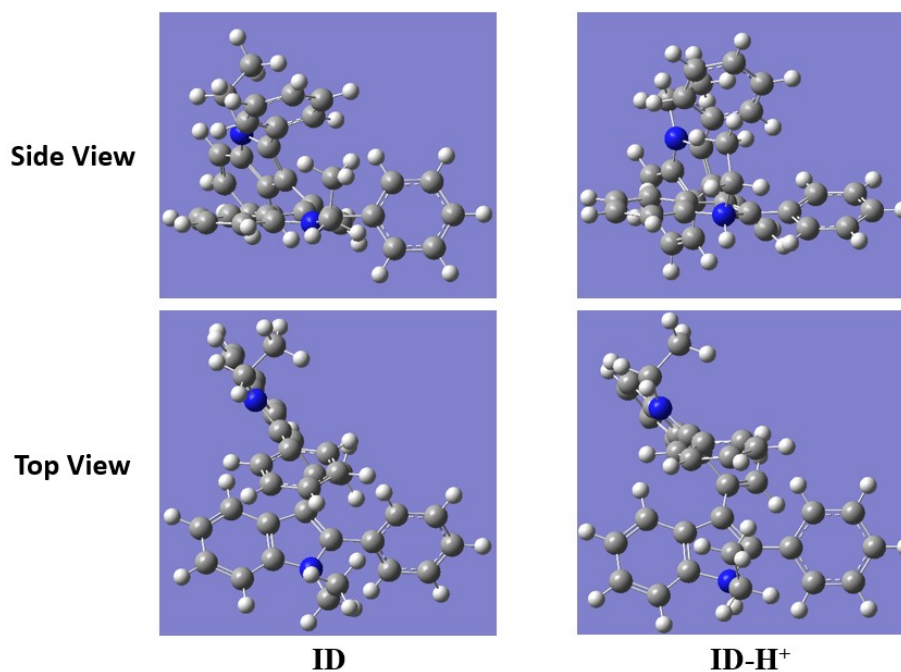

**Figure S6.** Optimized structure of the ID and the protonated ID.

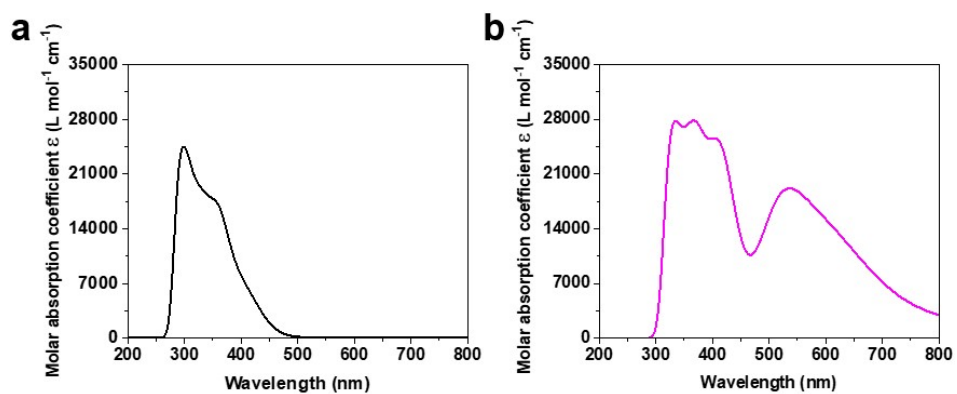

**Figure S7.** Simulated absorption spectra of (a) ID and (b) ID-H<sup>+</sup>.

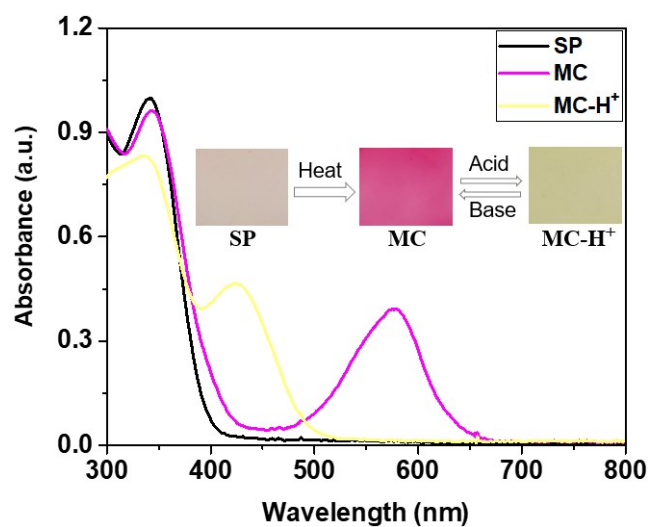

**Figure S8.** The corresponding absorption spectra and color changes for the SP, MC and MC-H<sup>+</sup> on a glass slide under external stimuli (The SP solutions were dip-coated onto the glass slide).
